# Supplementary material
Source: Royal Society of Chemistry journal article supplement (doi:10.1039/d6cp01448h)
Supplement: d6cp01448h1.pdf [file d6cp01448h1.pdf]

## Supporting Information for

### Nonadiabatic Dynamics in the Photodissociation of

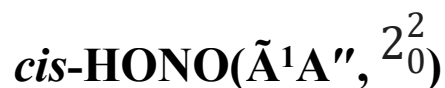

Zhibing Lu<sup>1#</sup>, Siting Hou<sup>2#</sup>, Peng Wang<sup>1#</sup>, Yu Zhang<sup>3</sup>, Shihao Li<sup>1</sup>, Fuyan Wu<sup>1</sup>, Fan Li<sup>1</sup>,  
Rongjing Guo<sup>3</sup>, Daofu Yuan<sup>3,4</sup>, Changjian Xie<sup>2\*</sup>, Xueming Yang<sup>3,5,6</sup> and Xingan  
Wang<sup>1,3\*</sup>

1. State Key Laboratory of Chemical Reaction Dynamics and Department of Chemical Physics, University of Science and Technology of China, Hefei, 230026, China.
2. Institute of Modern Physics, Shaanxi Key Laboratory for Theoretical Physics Frontiers, Northwest University, Xi'an 710127, China
3. Hefei National Laboratory, Hefei, 230088, China.
4. Hefei National Research Center for Physical Sciences at the Microscale, University of Science and Technology of China, Hefei, 230026, China
5. State Key Laboratory of Chemical Reaction Dynamics, Dalian Institute of Chemical Physics, Chinese Academy of Sciences, Dalian, 116023, China.
6. Department of Chemistry, College of Science, Southern University of Science and Technology, Shenzhen, 518055, China.

*# These authors contributed equally to this work*

*\* Corresponding authors:*

*[chjxie@nwu.edu.cn](mailto:chjxie@nwu.edu.cn), and [xawang@ustc.edu.cn](mailto:xawang@ustc.edu.cn),*

Table S1. Peak positions and peak widths in TKER of OH( $\tilde{X}^2\Pi$ ,  $F_1$ ,  $v = 0$ ,  $J$ ) products from photodissociation of *cis*- and *trans*-HONO( $2_0^2$ ) (All values are in  $\text{cm}^{-1}$ . pos = peak position; width = peak width (FWHM); OH(e/f) denotes the  $\Lambda$ -doublet components of OH.)

| Conformer                                      | $J$ | NO( $v=1$ ), |       | NO( $v=2$ ), |       | NO( $v=1$ ), |       | NO( $v=2$ ), |       |
|------------------------------------------------|-----|--------------|-------|--------------|-------|--------------|-------|--------------|-------|
|                                                |     | OH(e)        |       | OH(e)        |       | OH(f)        |       | OH(f)        |       |
|                                                |     | pos          | width | pos          | width | pos          | width | pos          | width |
| <i>trans</i> -<br>HONO( $2_0^2$ ) <sup>1</sup> | 1.5 | 8972         | 1231  | 6946         | 1293  | 8539         | 1353  | 6729         | 1200  |
|                                                | 2.5 | 8920         | 1324  | 7086         | 1354  | 8844         | 1238  | 7021         | 1699  |
|                                                | 3.5 | 8385         | 1217  | 6681         | 1424  | 8404         | 1393  | 6793         | 1352  |
| <i>cis</i> -HONO(<br>$2_0^2$ )                 | 1.5 | 8788         | 1429  | 7072         | 1451  | 8603         | 1450  | 6844         | 1400  |
|                                                | 2.5 | 8391         | 1495  | 6680         | 1274  | 8676         | 1454  | 7010         | 1478  |
|                                                | 3.5 | 8343         | 1300  | 6568         | 1300  | 8550         | 1390  | 6901         | 1350  |

Table S2. Vibrational branching ratios and anisotropy parameters of NO( $\tilde{X}^2\Pi$ ,  $v$ ) products from photodissociation of *cis*- and *trans*-HONO( $2_0^2$ ) (br = branching ratio; aniso = anisotropy parameter; OH(e/f) denotes the  $\Lambda$ -doublet components of the OH product.)

| Conformer                                     | $J$ | NO( $v=1$ ), |       | NO( $v=2$ ), |       | NO( $v=1$ ), |       | NO( $v=2$ ), |       |
|-----------------------------------------------|-----|--------------|-------|--------------|-------|--------------|-------|--------------|-------|
|                                               |     | OH(e)        |       | OH(e)        |       | OH(f)        |       | OH(f)        |       |
|                                               |     | br           | aniso | br           | aniso | br           | aniso | br           | aniso |
| <i>trans</i> -HONO(<br>$2_0^2$ ) <sup>1</sup> | 1.5 | 0.43         | -0.53 | 0.57         | -0.51 | 0.62         | -0.73 | 0.38         | -0.66 |
|                                               | 2.5 | 0.54         | -0.60 | 0.46         | -0.53 | 0.42         | -0.78 | 0.58         | -0.70 |
|                                               | 3.5 | 0.63         | -0.81 | 0.37         | -0.67 | 0.60         | -0.70 | 0.40         | -0.61 |
| <i>cis</i> -<br>HONO( $2_0^2$ )               | 1.5 | 0.36         | -0.84 | 0.64         | -0.76 | 0.50         | -0.73 | 0.50         | -0.63 |
|                                               | 2.5 | 0.43         | -0.82 | 0.57         | -0.75 | 0.38         | -0.83 | 0.62         | -0.73 |
|                                               | 3.5 | 0.45         | -0.83 | 0.55         | -0.76 | 0.49         | -0.77 | 0.51         | -0.67 |

## References

- 1 Z. Lu, S. Hou, P. Wang, Y. Zhang, S. Li, F. Wu, F. Li, R. Guo, D. Yuan, C. Xie, K. Yuan, D. H. Parker, X. Yang and X. Wang, *JACS Au*, 2026, **6**, 1860-1867.
